# Supplementary material for: Structural and neurophysiological alterations in Parkinson’s disease are aligned with cortical neurochemical systems
Source: bioRxiv or medRxiv preprint supplement (doi:10.1101/2023.04.04.23288137), 2023-04-05
Supplement: Supplementary file [file media-1.pdf]

## Supplemental Information for

# Structural and neurophysiological alterations in Parkinson's disease are aligned with cortical neurochemical systems

Alex I. Wiesman\* et al.

\*Corresponding author. Email: [alexander.wiesman@mail.mcgill.ca](mailto:alexander.wiesman@mail.mcgill.ca)

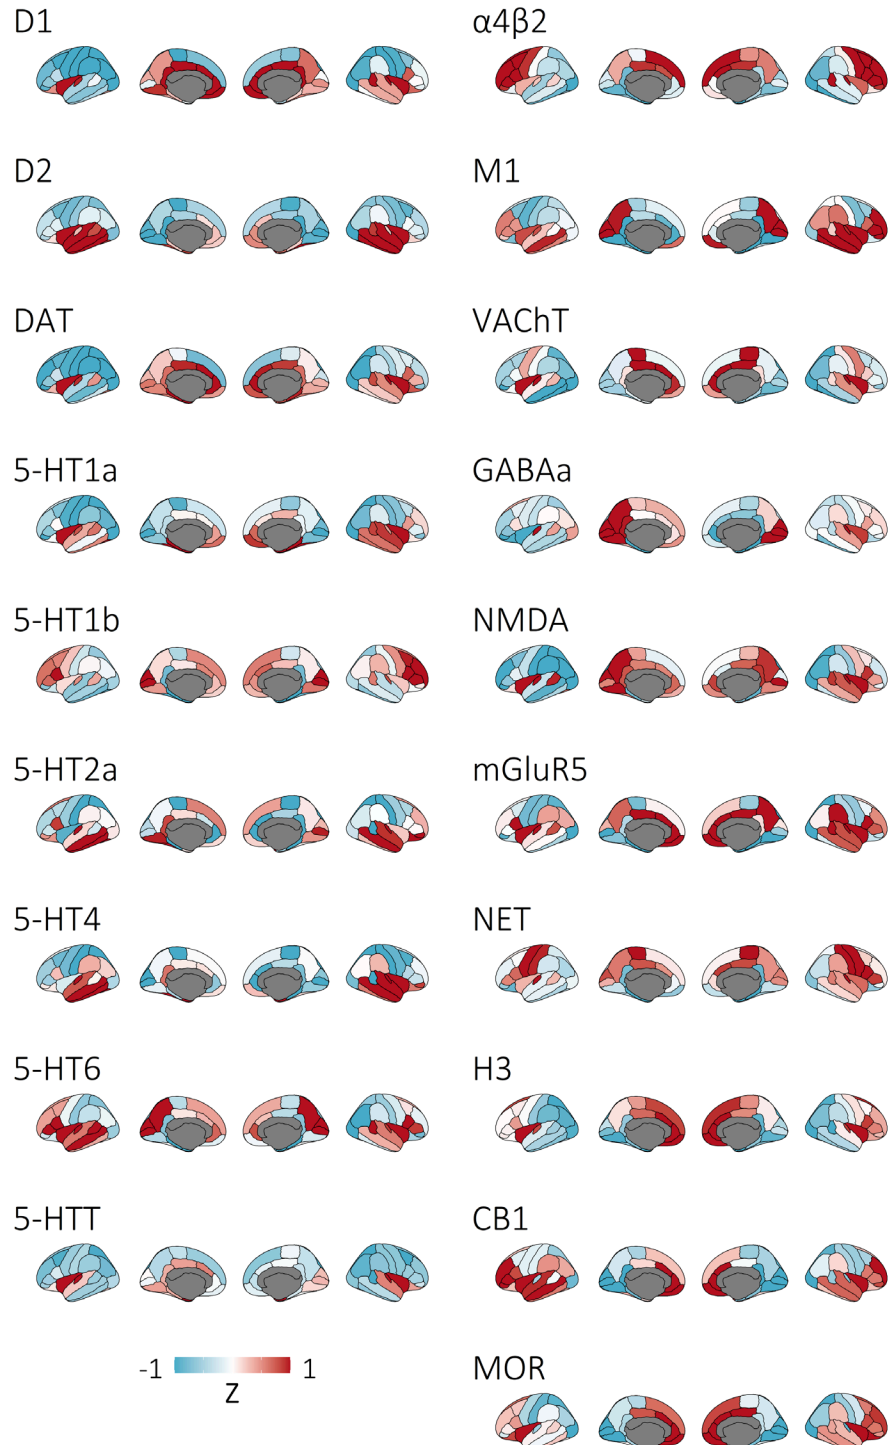

**Figure S1. Normative atlases of 19 neurotransmitter system densities.** Brain maps represent normative densities of 19 neurotransmitter receptor and transporters from the *neuromaps* multi-atlas, measured with positron emission tomography (PET) in healthy adult participants. Maps have been internally z-scored for comparison of spatial patterns across PET outcome measures with different scales.

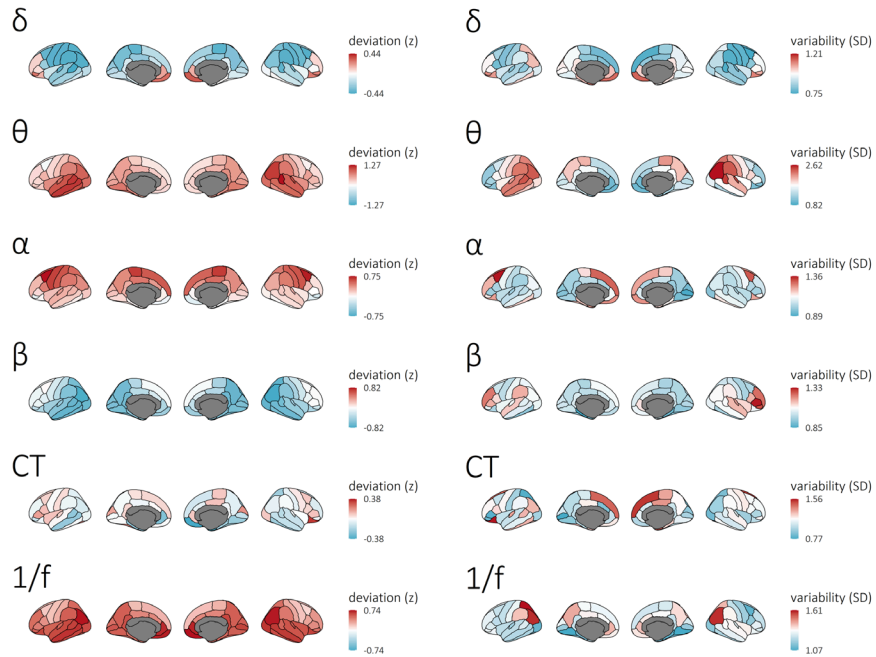

**Figure S2. Central tendency and variability of cortical neurophysiological alterations in patients with Parkinson's disease.** Brain maps in the left column display the mean deviation of each indicated metric relative to healthy controls, derived across all patients with Parkinson's disease. Maps in the right column indicate the variability of these deviations across patients, which was leveraged by the linear mixed model approach to colocalization analysis.

**Table S1.** Demographic comparisons and patient group clinical profile – neurophysiological data.

| <b>Group</b>       | <b>Age</b><br>(years)   | <b>Sex</b><br>(% male)       | <b>Handedness</b><br>(# left/ambi)  | <b>Education</b><br>(years)             |
|--------------------|-------------------------|------------------------------|-------------------------------------|-----------------------------------------|
| <b>HC</b> (N = 65) | 63.02 (8.13)            | 64.62                        | 3/3                                 | 15.85 (3.72)*                           |
| <b>PD</b> (N = 79) | 64.60 (8.21)            | 70.89                        | 5/3                                 | 15.05 (3.04)                            |
| <i>p</i>           | .382                    | .422                         | .883                                | .444                                    |
|                    | <b>MoCA</b><br>(N = 70) | <b>UPDRS-III</b><br>(N = 61) | <b>Hoehn &amp; Yahr</b><br>(N = 57) | <b>% Taking DA Agonists</b><br>(N = 66) |
| <b>PD</b>          |                         |                              |                                     |                                         |
| <b>Range</b>       | 12 – 30                 | 7 – 71                       | 1 – 3                               | –                                       |
| <b>Mean (SD)</b>   | 24.39 (3.98)            | 32.44 (14.64)                | 1.90 (0.70)                         | 31.82                                   |

HC: healthy control group; PD: Parkinson’s disease group; MoCA: Montreal Cognitive Assessment; UPDRS-III: Unified Parkinson’s Disease Rating Scale part III; DA: Dopamine. Unless otherwise indicated, values indicate means and associated parentheses indicate standard deviations. P-values indicate significance of between-groups Mann-Whitney U tests and chi-square tests for continuous and categorical variables, respectively. \*N = 59; highest level of education was not reported by six HC participants.

**Table S2.** Demographic comparisons and patient group clinical profile – cortical thickness data.

| <b>Group</b> | <b>Age</b><br>(years)   | <b>Sex</b><br>(% male)       | <b>Handedness</b><br>(# left/ambi)  | <b>Education</b><br>(years)             |       |
|--------------|-------------------------|------------------------------|-------------------------------------|-----------------------------------------|-------|
| HC (N = 37)  | 64.76 (9.54)            | 48.65                        | 2/0*                                | 14.71 (4.66)**                          |       |
| PD (N = 65)  | 64.68 (7.93)            | 67.69                        | 3/2                                 | 14.76 (2.57)                            |       |
|              | <i>p</i>                | .656                         | .058                                | .593                                    |       |
|              | <b>MoCA</b><br>(N = 57) | <b>UPDRS-III</b><br>(N = 51) | <b>Hoehn &amp; Yahr</b><br>(N = 50) | <b>% Taking DA Agonists</b><br>(N = 55) |       |
| <b>PD</b>    |                         |                              |                                     |                                         |       |
|              | <b>Range</b>            | 12 – 30                      | 7 – 71                              | 1 – 3                                   | –     |
|              | <b>Mean (SD)</b>        | 24.16 (4.04)                 | 32.63 (14.19)                       | 1.89 (0.72)                             | 30.91 |

HC: healthy control group; PD: Parkinson’s disease group; MoCA: Montreal Cognitive Assessment; UPDRS-III: Unified Parkinson’s Disease Rating Scale part III; DA: Dopamine. Unless otherwise indicated, values indicate means and associated parentheticals indicate standard deviations. P-values indicate significance of between-groups Mann-Whitney U tests and chi-square tests for continuous and categorical variables, respectively. \*N = 17; handedness was not reported by twenty HC participants. \*\*N = 28; highest level of education was not reported by nine HC participants.

## *Consortium Authors*

A complete listing of **PREVENT-AD Research Group** can be found in the PREVENT-AD database:

[https://preventad.loris.ca/acknowledgements/acknowledgements.php?date=\[2022-02-01\]](https://preventad.loris.ca/acknowledgements/acknowledgements.php?date=[2022-02-01])

The members of the **Quebec Parkinson Network** are listed alphabetically below:

Isabelle Beaulieu-Boire - Université de Sherbrooke, Sherbrooke, Canada  
Pierre Blanchet - Université de Montréal, Montréal, Canada  
Sarah Bogard - Montreal Neurological Institute, McGill University, Montreal, Canada  
Manon Bouchard – Clinique NeuroLévis, Lévis, Canada  
Sylvain Chouinard - Université de Montréal, Montréal, Canada  
Francesca Cicchetti - CHU de Québec-Université Laval, Québec, Canada  
Martin Cloutier - Neuro-Rive-Sud, Longueuil, Canada  
Alain Dagher - Montreal Neurological Institute, McGill University, Montreal, Canada  
Samir Das - Montreal Neurological Institute, McGill University, Montreal, Canada  
Clotilde Degroot - Montreal Neurological Institute, McGill University, Montreal, Canada  
Alex Desautels - Université de Montréal, Montréal, Canada  
Marie Hélène Dion - Université de Montréal, Montréal, Canada  
Janelle Drouin-Ouellet - Université de Montréal, Montréal, Canada  
Anne-Marie Dufresne - CHU de Québec-Hôpital de l'Enfant-Jésus, Québec, Canada  
Nicolas Dupré - CHU de Québec-Université Laval, Québec, Canada  
Antoine Duquette - Université de Montréal, Montréal, Canada  
Thomas Durcan - Montreal Neurological Institute, McGill University, Montreal, Canada  
Lesley K. Fellows - Montreal Neurological Institute, McGill University, Montreal, Canada  
Edward Fon - Montreal Neurological Institute, McGill University, Montreal, Canada  
Jean-François Gagnon - Université du Québec à Montréal, Montréal, Canada  
Ziv Gan-Or - Montreal Neurological Institute, McGill University, Montreal, Canada  
Angela Genge - Montreal Neurological Institute, McGill University, Montreal, Canada  
Nicolas Jodoin - Centre hospitalier de l'Université de Montréal, Montréal, Canada  
Jason Karamchandani - Montreal Neurological Institute, McGill University, Montreal, Canada  
Anne-Louise Lafontaine - Montreal Neurological Institute, McGill University, Montreal, Canada  
Mélanie Langlois - CHU de Québec-Université Laval, Québec, Canada  
Etienne Leveille - Montreal Neurological Institute, McGill University, Montreal, Canada  
Martin Lévesque - Université Laval, Québec, Canada  
Calvin Melmed - McGill University, Montreal, Canada  
Oury Monchi - Université de Montréal, Montréal, Canada  
Jacques Montplaisir - Université de Montréal, Montréal, Canada  
Michel Panisset - Université de Montréal, Montréal, Canada  
Martin Parent - Université Laval, Québec, Canada  
Minh-Thy Pham-An - Hôpital Hôtel-Dieu de Saint-Jérôme, Saint-Jérôme, Canada  
Jean-Baptiste Poline - Montreal Neurological Institute, McGill University, Montreal, Canada  
Ronald Postuma - Montreal Neurological Institute, McGill University, Montreal, Canada

Emmanuelle Pourcher - CHU de Québec-Université Laval, Québec, Canada

Trisha Rao - McGill University, Montreal, Canada

Jean Rivest - CHU de Québec-Université Laval, Québec, Canada

Guy Rouleau - Montreal Neurological Institute, McGill University, Montreal, Canada

Madeleine Sharp - Montreal Neurological Institute, McGill University, Montreal, Canada

Valérie Soland - CHU de Montréal, Montréal, Canada

Michael Sidel - Montreal Neurological Institute, McGill University, Montreal, Canada

Sonia Lai Wing Sun - Montreal Neurological Institute, McGill University, Montreal, Canada

Alexander Thiel - McGill University, Montreal, Canada

Paolo Vitali - McGill University, Montreal, Canada
